# Supplementary material for: Strain-induced spin-gapless semiconductors and pure thermal spin-current in magnetic black arsenic-phosphorus monolayers
Source: Royal Society of Chemistry journal article supplement (doi:10.1039/d2cp01108e), 2022-01-01
Supplement: d2cp01108e1.pdf [file d2cp01108e1.pdf]

## Supplementary information

### Strain-induced spin-gapless semiconductors and pure thermal spin-current in magnetic black arsenic-phosphorus monolayer

Yutian Ji,<sup>1</sup> Xingyi Tan<sup>2,3</sup>, Xiao-yu Yue,<sup>1</sup> Yan Sun,<sup>1</sup> Yiyan Wang,<sup>1</sup> Hui Liang,<sup>1</sup> Qiuju Li,<sup>4</sup>  
Xuefeng Sun<sup>5, 1</sup> and Dandan Wu<sup>1</sup>

<sup>1</sup>*Institutes of Physical Science and Information Technology, Anhui University, Hefei, Anhui 230601, People's Republic of China.*

<sup>2</sup>*Department of Physics, Chongqing Three Gorges University, Chongqing, Wanzhou 404100, People's Republic of China.*

<sup>3</sup>*School of Information Engineering, Hubei Minzu University, Hubei, Enshi 445000, People's Republic of China.*

<sup>4</sup>*School of Physical and Materials Science, Anhui University, Hefei, Anhui 230601, People's Republic of China.*

<sup>5</sup>*Department of Physics, Hefei National Laboratory for Physical Sciences at Microscale, and Key Laboratory of Strongly-Coupled Quantum Matter Physics (CAS), University of Science and Technology of China, Hefei, Anhui 230026, People's Republic of China.*

(\*Electronic mail: [ddw@ahu.edu.cn](mailto:ddw@ahu.edu.cn) and [xfsun@ustc.edu.cn](mailto:xfsun@ustc.edu.cn))

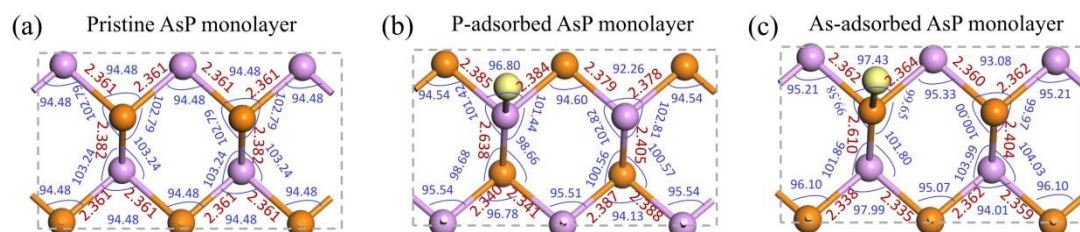

**Fig. S1** (a)-(c) The optimized bond lengths and bond angles of the pristine AsP monolayer, P- and As-adsorbed AsP nanosheets, respectively.

**Table S1:** The optimized lattice constants ( $a$ ,  $b$ ,  $c$ ), three angles ( $\alpha$ ,  $\beta$ ,  $\gamma$ ) and the bond length ( $l$ ) of P-Cl (As-Cl) for pristine AsP monolayer, P- and As-adsorbed AsP nanosheets, respectively.

|                 | $a$ (Å) | $b$ (Å) | $c$ (Å) | $\alpha$ (°) | $\beta$ (°) | $\gamma$ (°) | $l$ (Å) |
|-----------------|---------|---------|---------|--------------|-------------|--------------|---------|
| Pristine AsP    | 4.787   | 6.934   | 9.792   | 90           | 90          | 90           | —       |
| P-adsorbed AsP  | 4.593   | 6.996   | 9.997   | 89.957       | 90.885      | 89.980       | 2.194   |
| As-adsorbed AsP | 4.607   | 6.971   | 10.020  | 90.109       | 90.828      | 89.987       | 2.0285  |

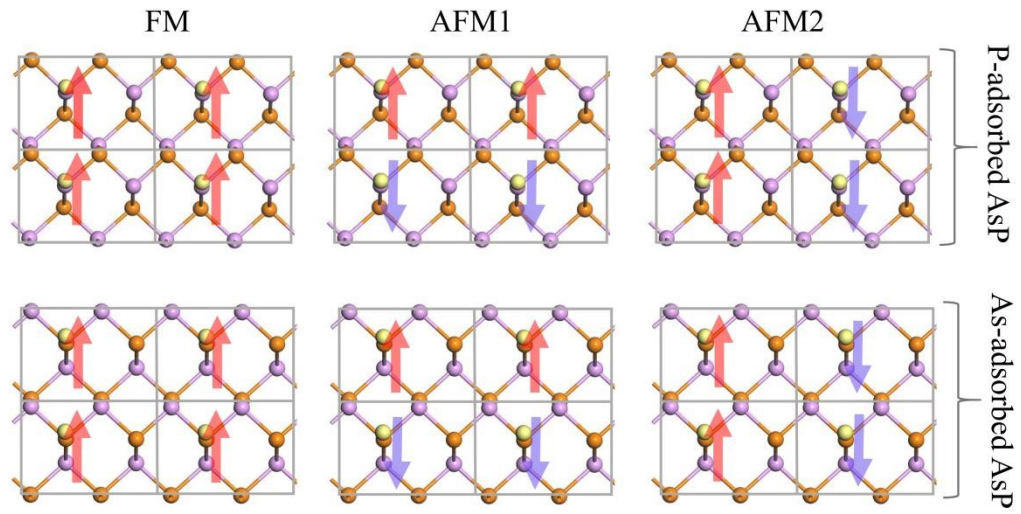

**Fig. S2** Three different spin configurations of ferromagnetic (FM) and antiferromagnetic states (AFM1 or AFM2) for P- and As-adsorbed AsP monolayer, respectively.

**Table S2:** The energies (in meV) of antiferromagnetic states (AFM1 and AFM2) compared with the ferromagnetic (FM) state (set as 0).

|                 | FM | AFM1 | AFM2 |
|-----------------|----|------|------|
| P-adsorbed AsP  | 0  | 27.5 | 6.2  |
| As-adsorbed AsP | 0  | 22.4 | 5.8  |

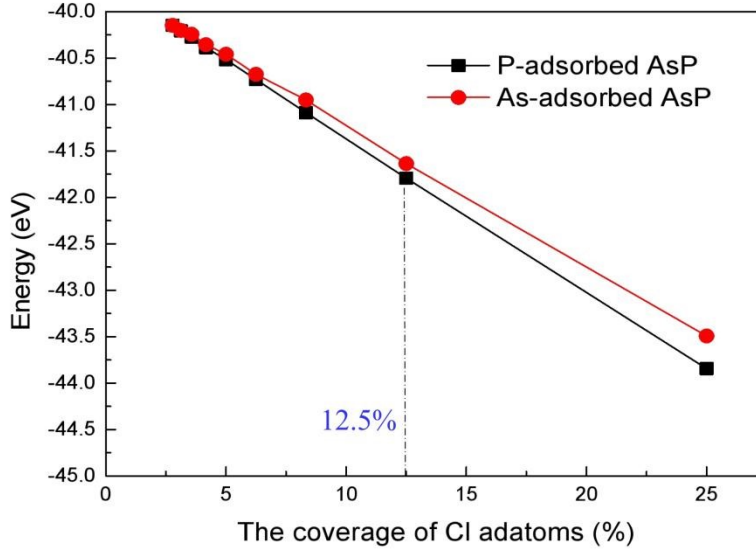

**Fig. S3** The equivalent energies of the different coverages for Cl adatoms compared to P- and As-adsorbed monolayer with the 12.5% coverage, respectively.

**Table S3:** Binding energies of P- and As-adsorbed AsP monolayer, defined as  $E_b = E_S - E_{AsP} - E_{Cl_2}/2$ , where  $E_S$ ,  $E_{AsP}$  and  $E_{Cl_2}$  stand for the energies of AsP monolayer with one Cl adatom, pristine AsP monolayer and  $Cl_2$  molecule, respectively.

|                 | $E_b$ (eV) | $E_S$ (eV) | $E_{AsP}$ (eV) | $E_{Cl_2}$ (eV) |
|-----------------|------------|------------|----------------|-----------------|
| P-adsorbed AsP  | -0.877     | -41.793    | -39.128        | -3.575          |
| As-adsorbed AsP | -0.720     | -41.636    | -39.128        | -3.575          |

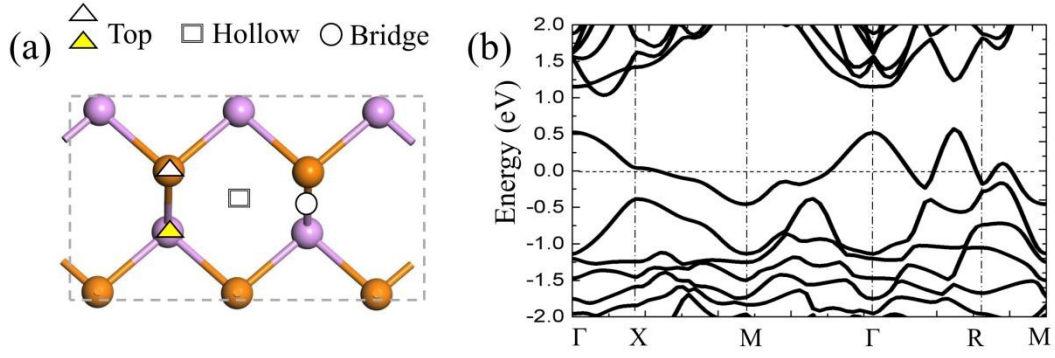

**Fig. S4** (a) Three adsorption positions for AsP monolayer with the Cl adatom: top, hollow and bridge sites. (b) Band structures of AsP monolayer with the Cl adatom on bridge site.

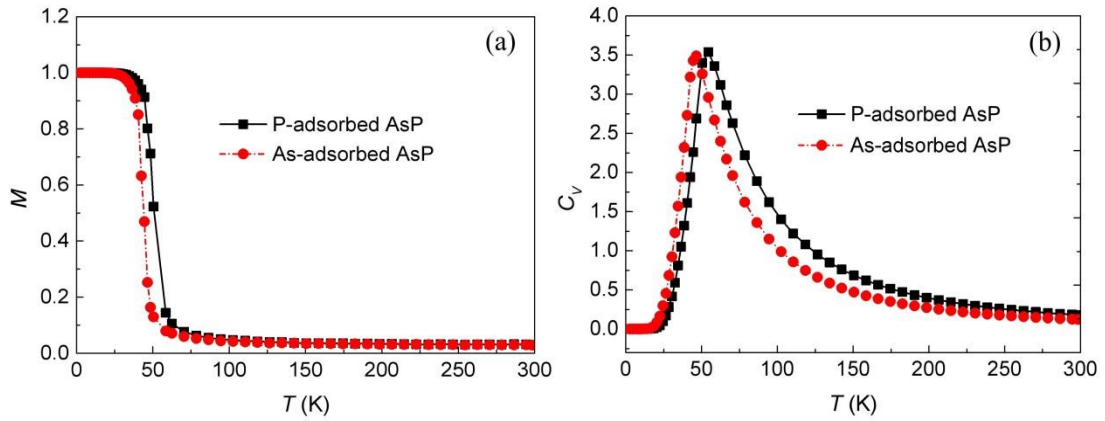

**Fig. S5** Monte Carlo simulations for the P- and As-adsorbed AsP monolayer: (a) magnetism ( $M$ ) and (b) heat capacity ( $C_V$ ) versus temperature. We use the Heisenberg model to describe the spin interaction and the related lattice Hamiltonian can be expressed as follows:

$$H = -J_1 \sum_{\langle i,j \rangle} S_i S_j - J_2 \sum_{\langle k,l \rangle} S_k S_l$$

where  $S_i, S_j$  and  $S_k, S_l$  refer to the spin operators on the nearest and next nearest-neighbour lattice points  $\langle i,j \rangle$  and  $\langle k,l \rangle$ , respectively.  $J_1$  and  $J_2$  stand for the nearest and next nearest-neighbour interaction energies, respectively, estimated by the energy difference between the ferromagnetic and anti-ferromagnetic state shown in Table S2 and Fig. S2.

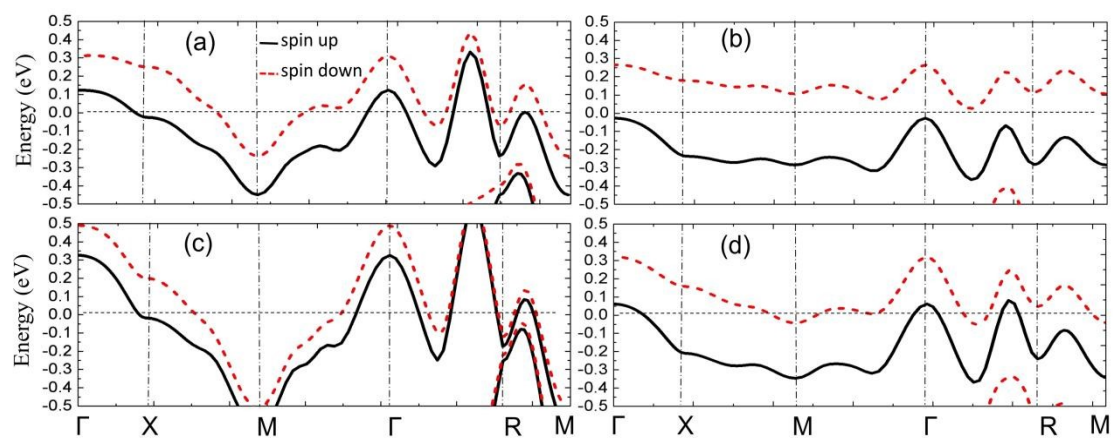

**Fig. S6** (a) and (b) Band structures of the AsP monolayer with one P atom adsorbed by one fluorine (F) and one bromine (Br) atom, respectively. (c) and (d) Band structures of the AsP monolayer with one As atom adsorbed by one F and one Br atom, respectively.
